# Supplementary material for: Overexpression of CERKL Protects Retinal Pigment Epithelium Mitochondria from Oxidative Stress Effects
Source: MDPI journal article supplement (doi:10.3390/antiox10122018), 2021-12-19
Supplement: s1 [file s1]

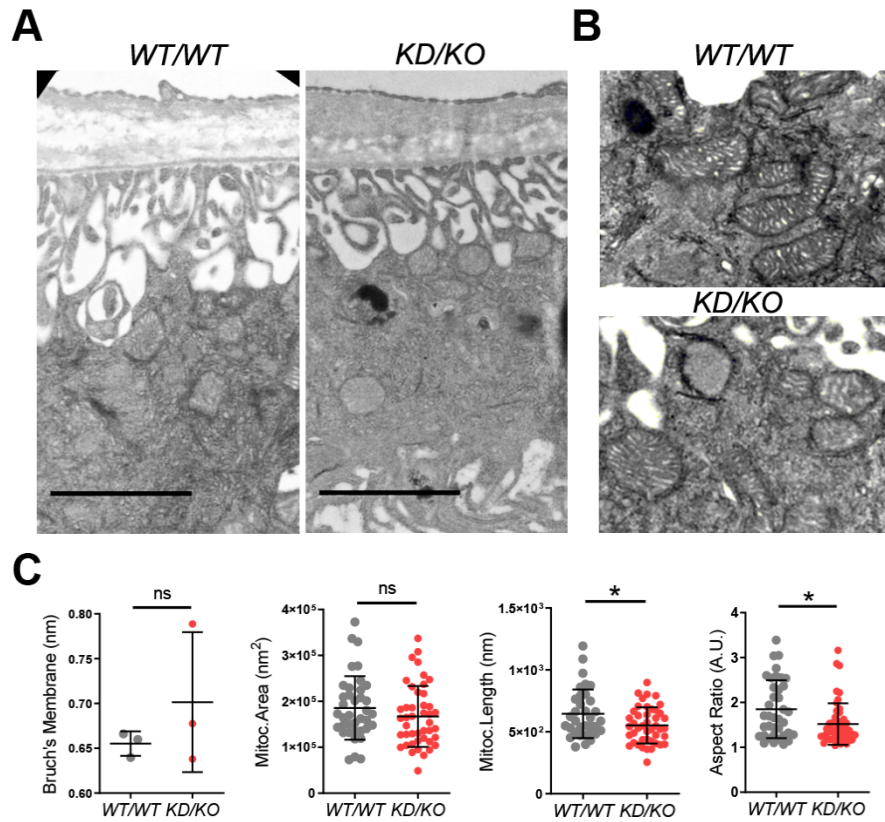

**Figure S1. Mitochondrial fragmentation in RPE from 18-month-old KD/KO albino mice.** (A-B) TEM microphotographies of retinal pigmented cells from WT/WT and KD/KO of old mice (18 months) were used to quantify different aspects of mitochondria. (C) Graphics of Bruch's membrane width, and mitochondrial area, length, and aspect ratio. Scale bar: 500 nm. The data are expressed as the mean  $\pm$ SD, n=38-44 mitochondria from 3 animals per group. Statistical analysis by Mann-Whitney test: \*p-value  $\leq$  0,05.
